# Supplementary material for: Co3(2-OOCC6H4PO3)2(H2O)3·H2O: A layered metal phosphonate showing reversible dehydration–rehydration behavior and ferrimagnetism
Source: Royal Society of Chemistry journal article supplement (doi:10.1039/c0dt01019g), 2011-01-01
Supplement: c0dt01019g.pdf [file c0dt01019g.pdf]

## Supporting information

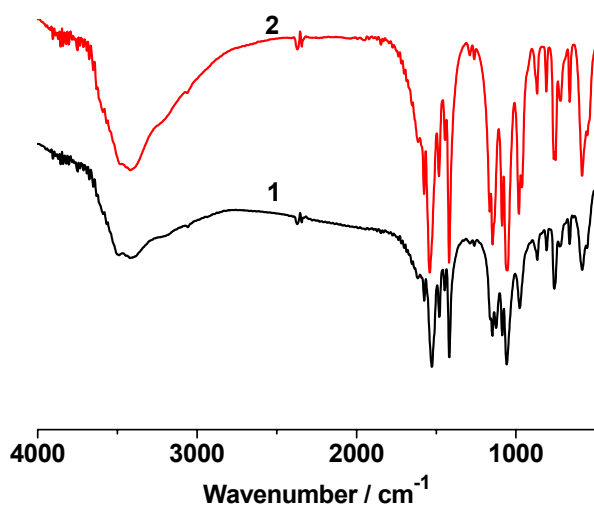

Figure S1. IR spectra for compounds 1 and 2.

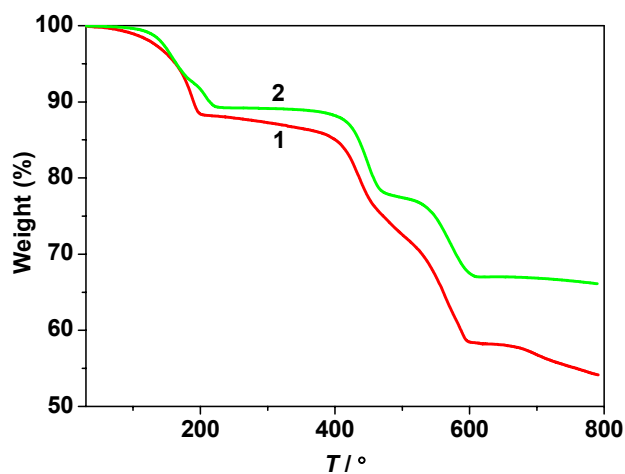

Figure S2. TGA curves for compounds 1 and 2.

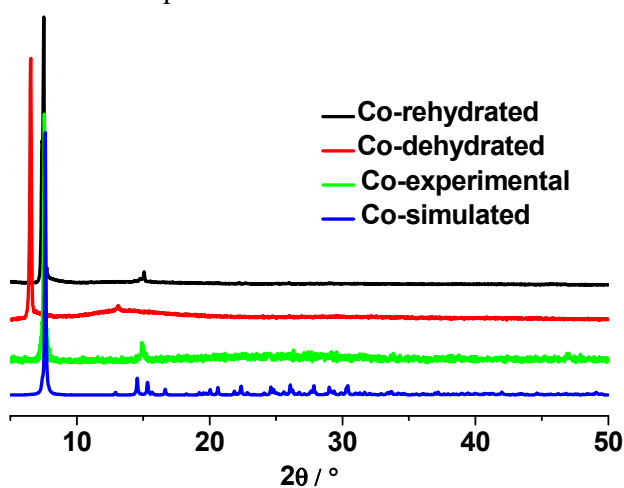

Figure S3. XRD patterns for as-synthesized, the dehydrated and rehydrated compound 1.

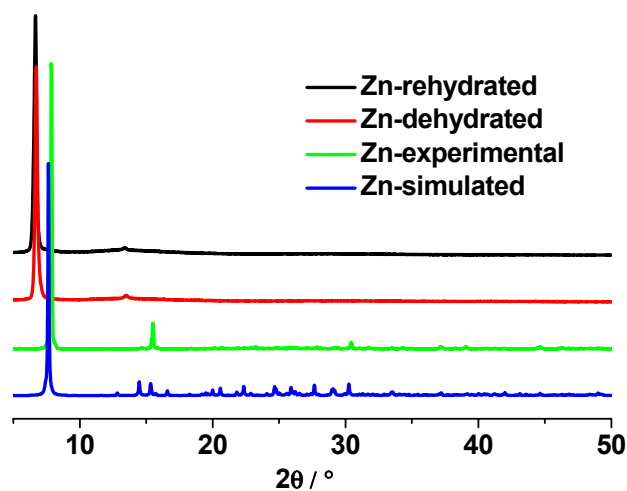

**Figure S4.** XRD patterns for as-synthesized, the dehydrated and rehydrated compound 2.

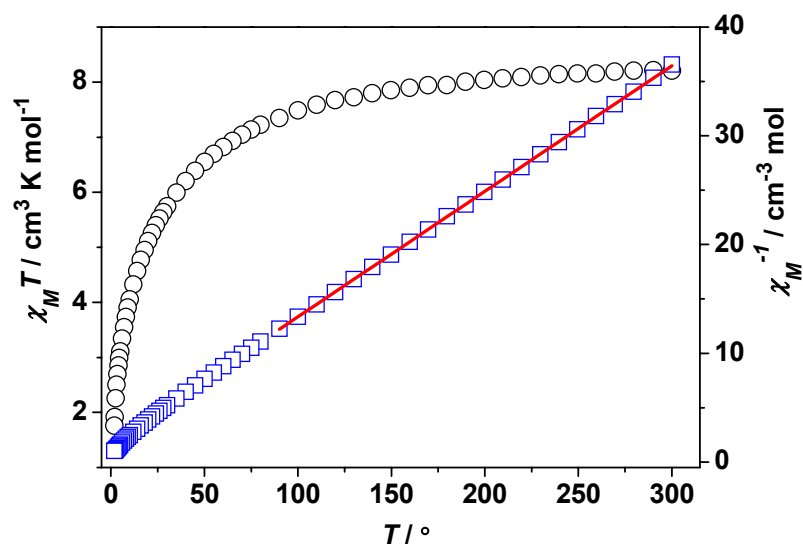

**Figure S5.** The  $\chi_M^{-1}$  and  $\chi_M T$  vs  $T$  plots for the **1-de**.

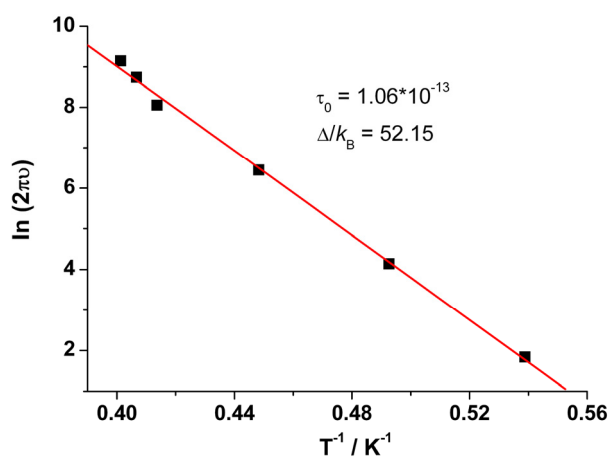

**Figure S6.** Plot of  $\ln(2\pi\nu)$  versus reciprocal temperature for **1-de**.
